# Supplementary material for: Identification of oncogenic driver mutations by genome-wide CRISPR-Cas9 dropout screening
Source: PubMed Central journal article supplement (PMC5016932; doi:10.1186/s12864-016-3042-2), 2016-09-09

# Supplementary figures

**a****HCC-827 EGFR<sup>delE746</sup>**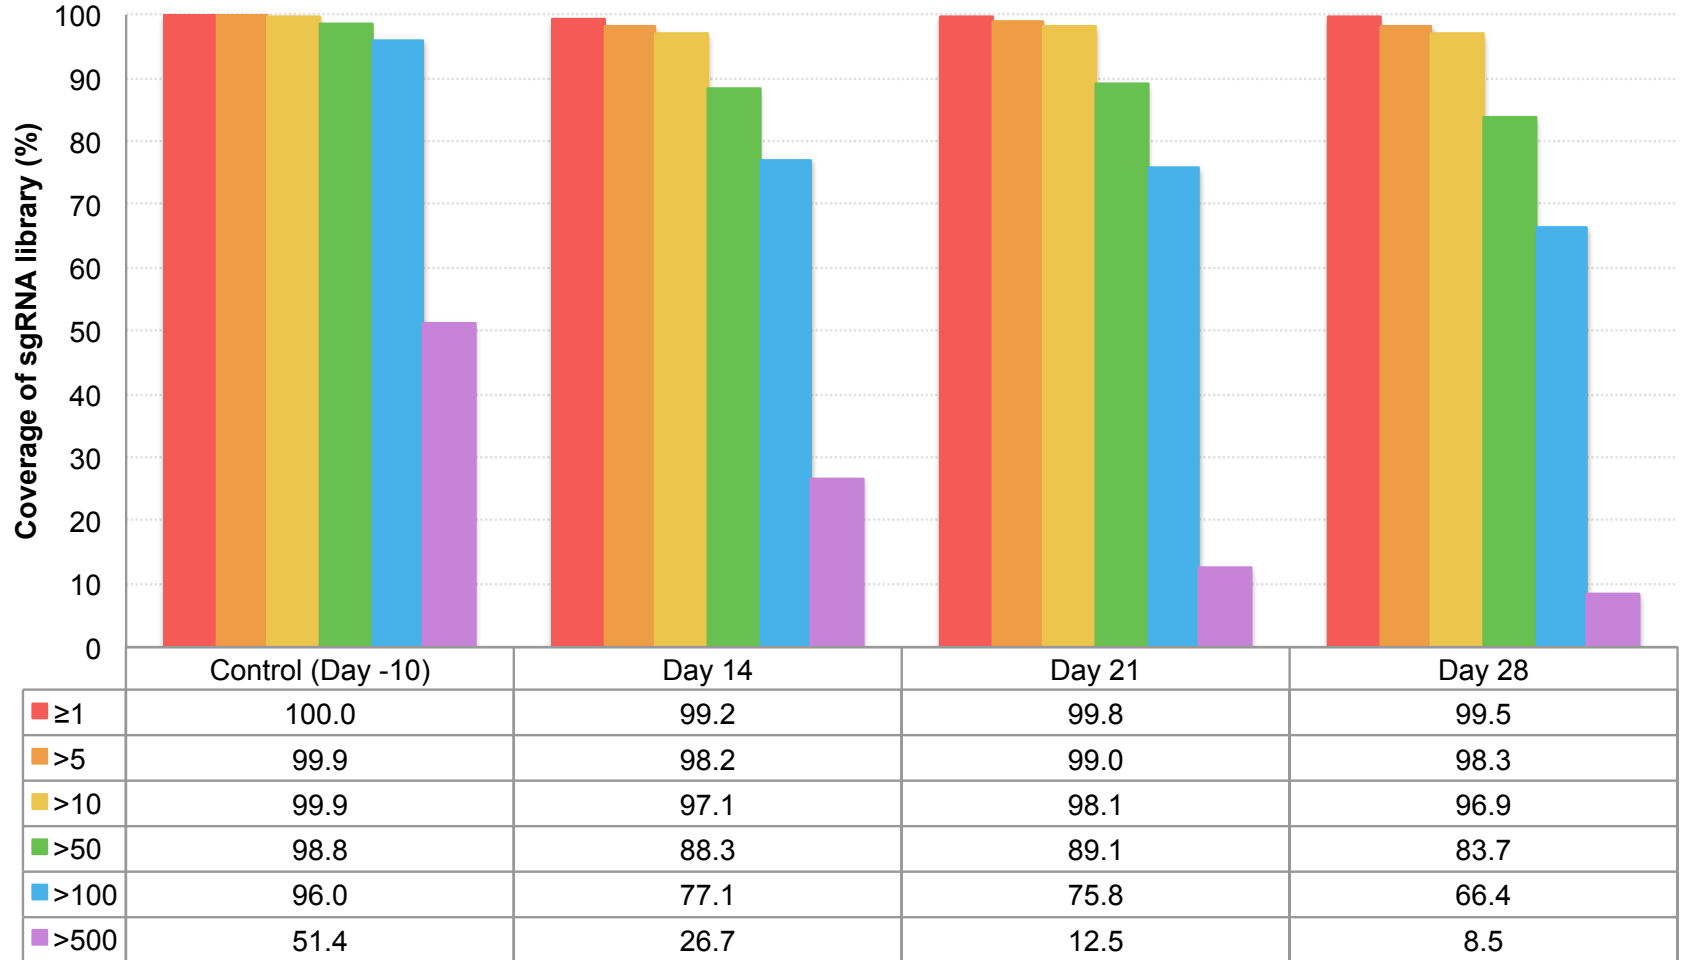

**b****CHP-212 NRAS<sup>Q61K</sup>**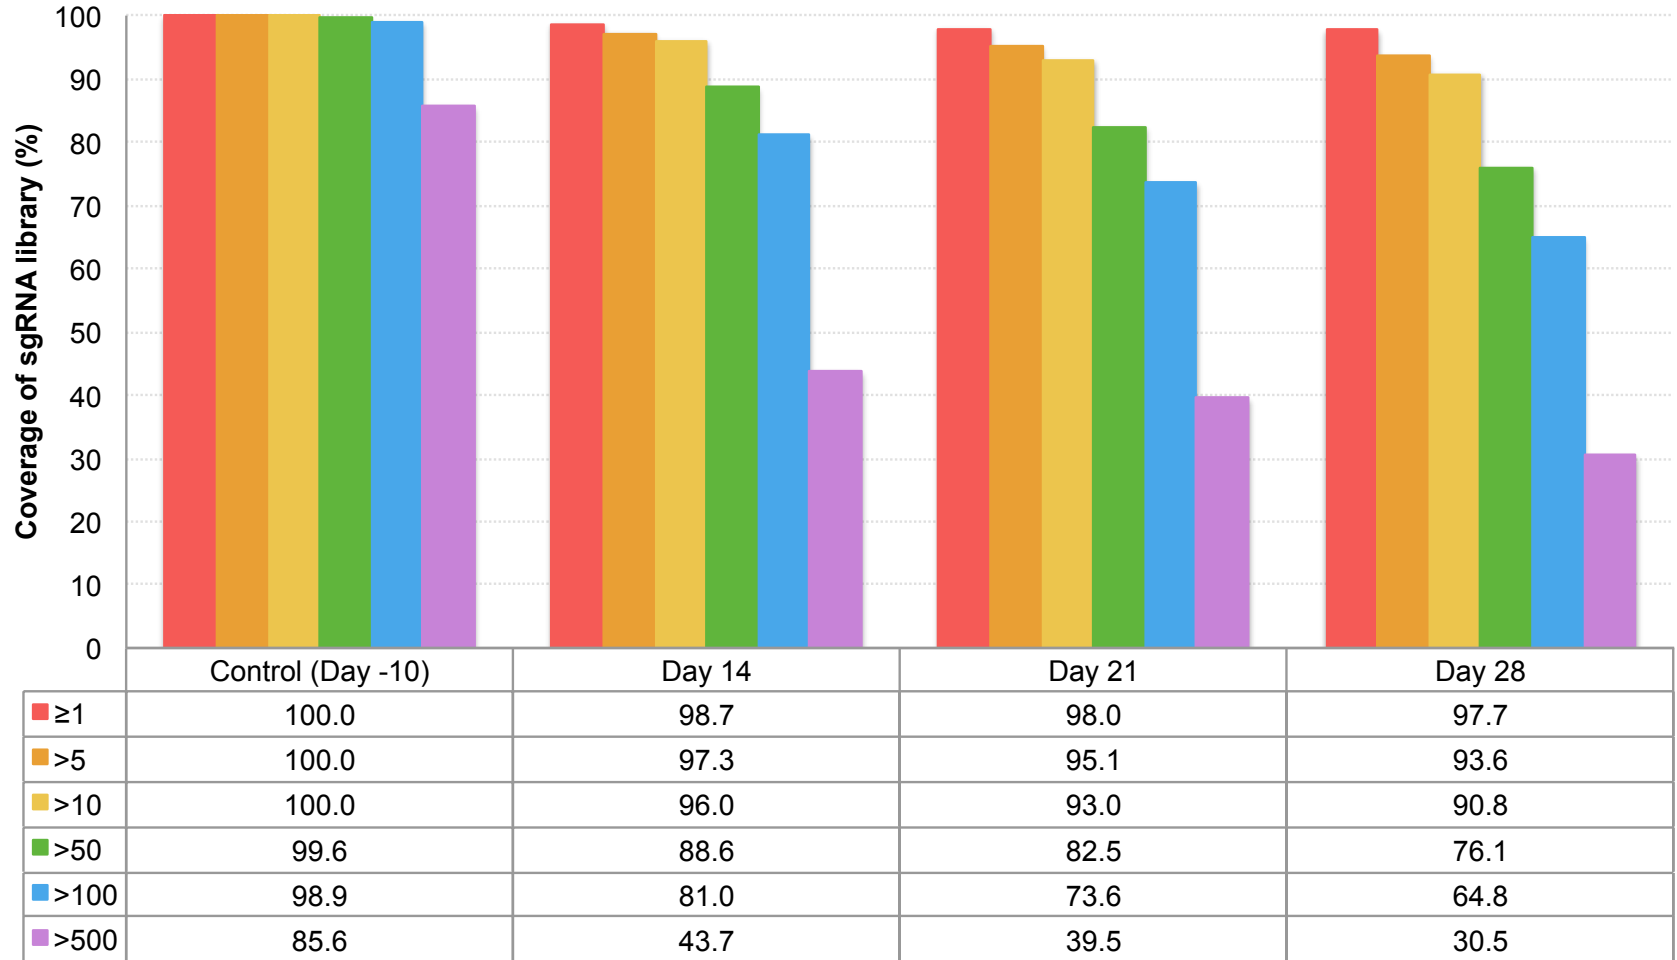

**a** HCC-827 EGFR<sup>del E746</sup>

- Control (Day -10)
- Day 14
- Day 21
- Day 28

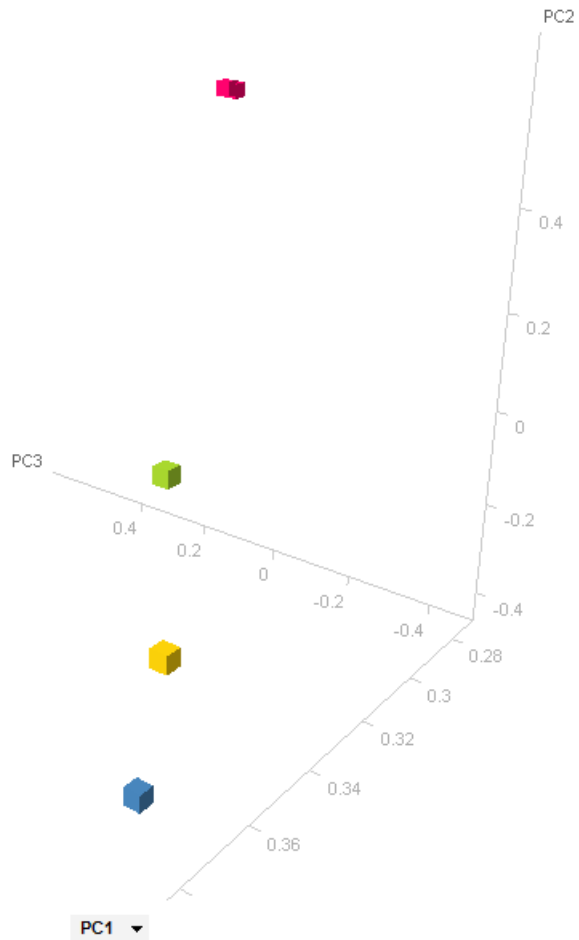

**b** CHP-212 NRAS<sup>Q61K</sup>

- Control (Day -10)
- Day 14
- Day 21
- Day 28

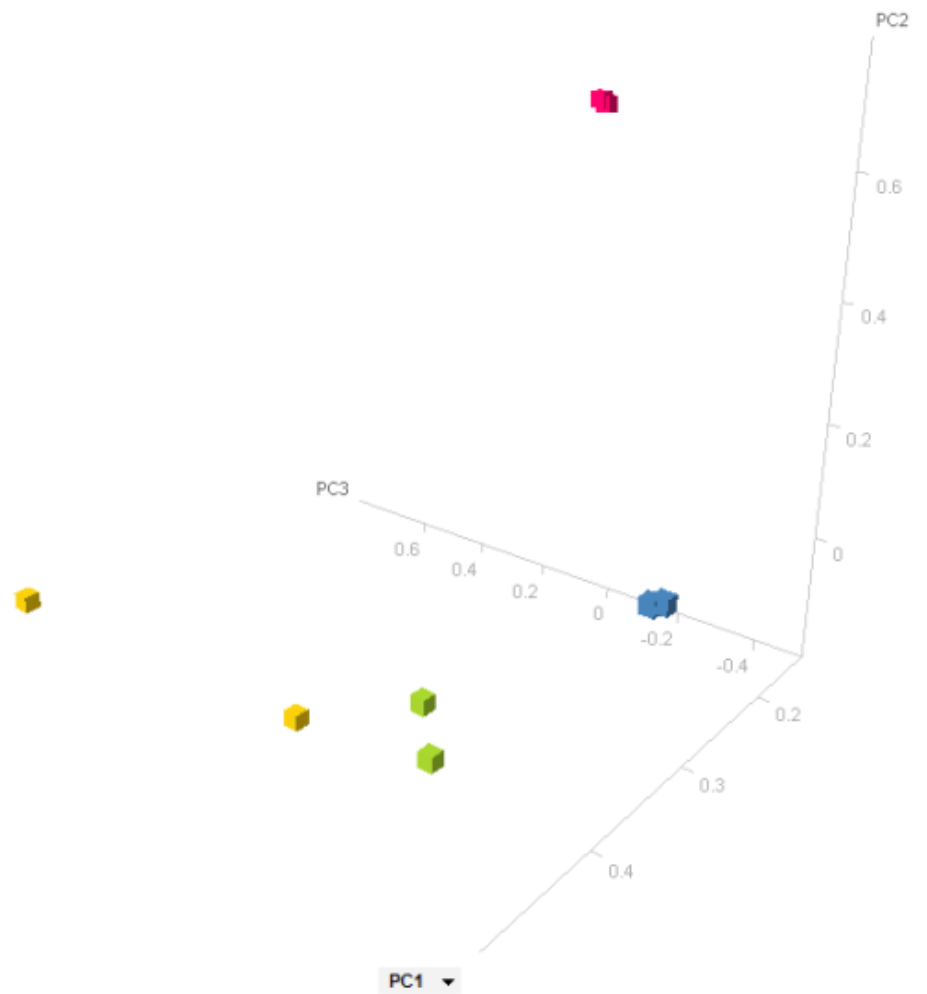

**a**

**HCC-827 EGFR<sup>del E746</sup>**

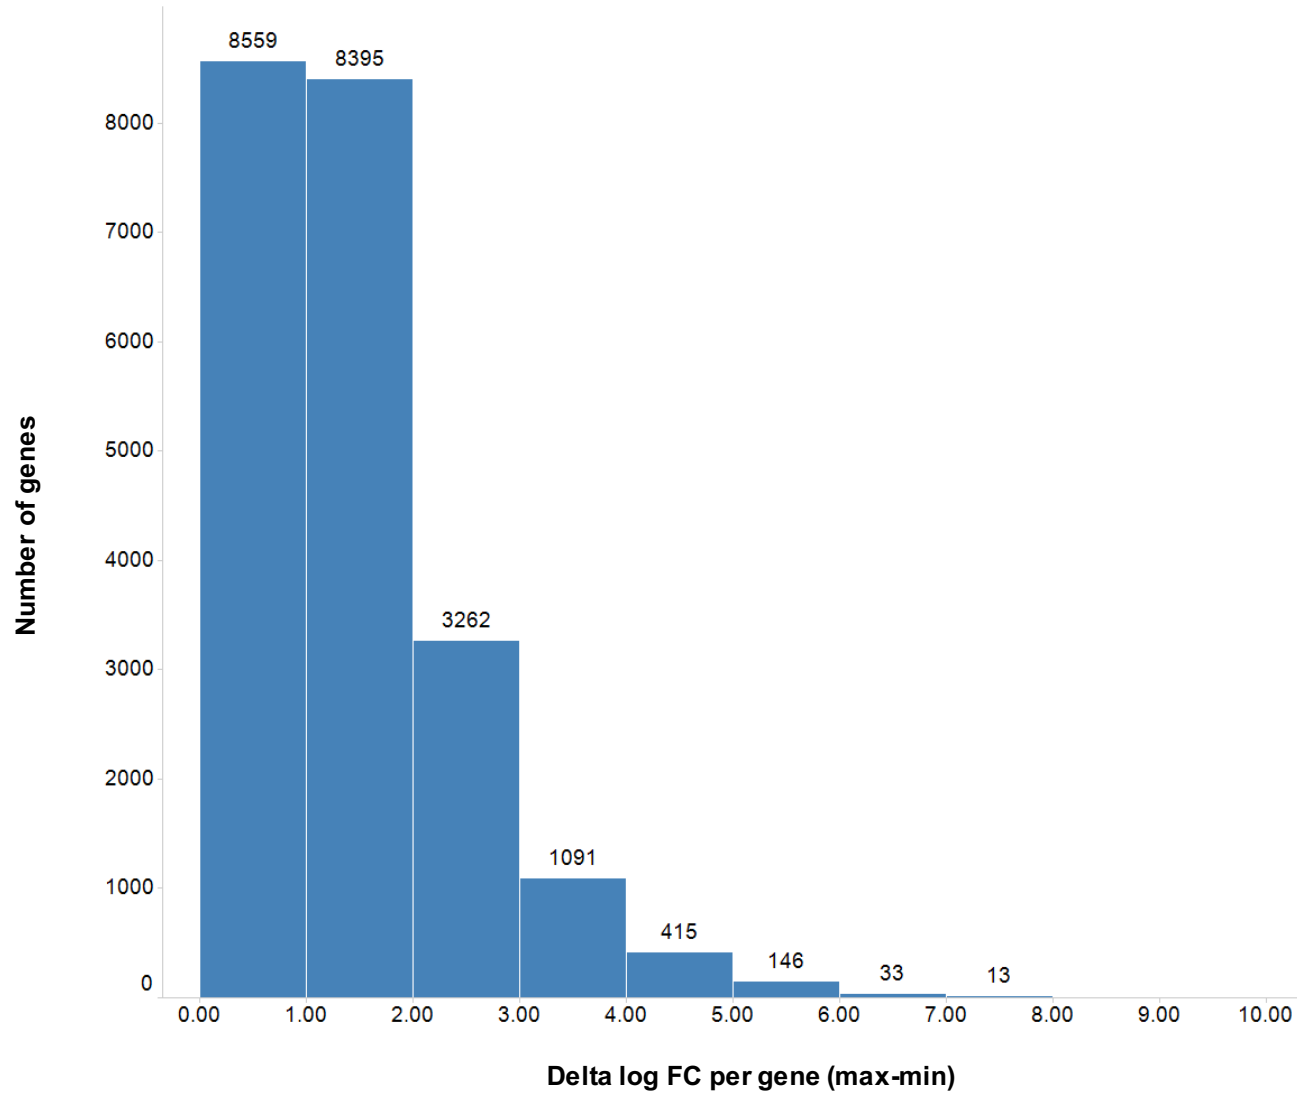

**b**

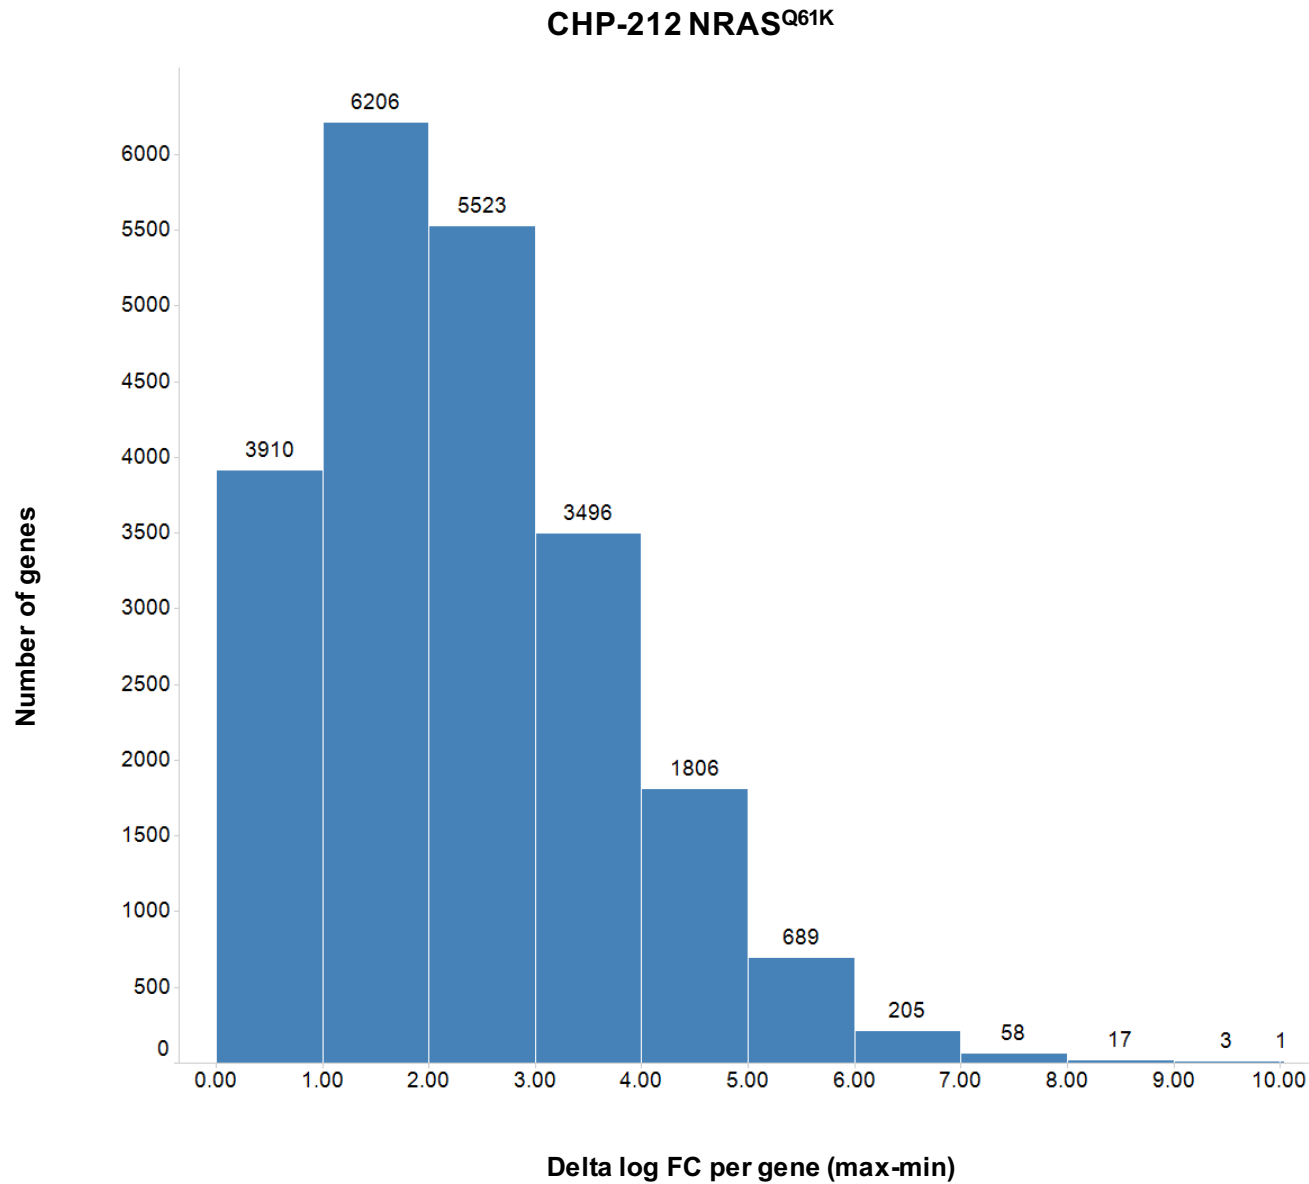

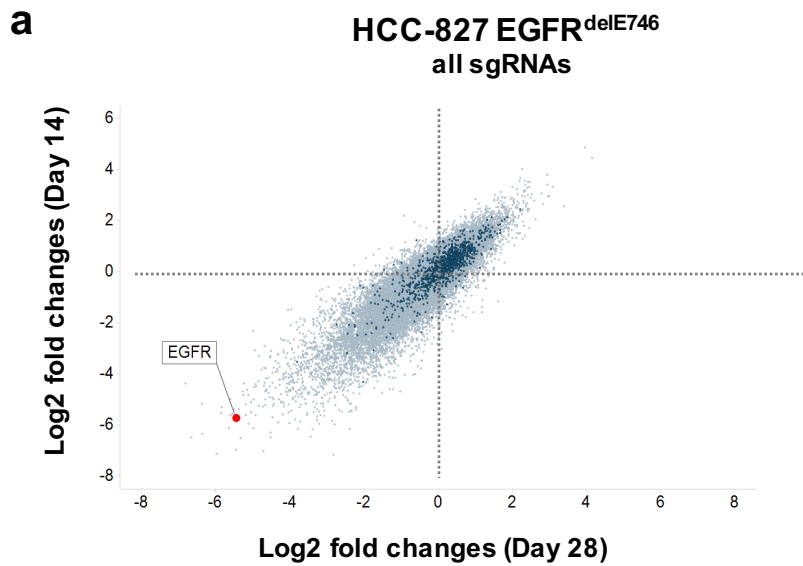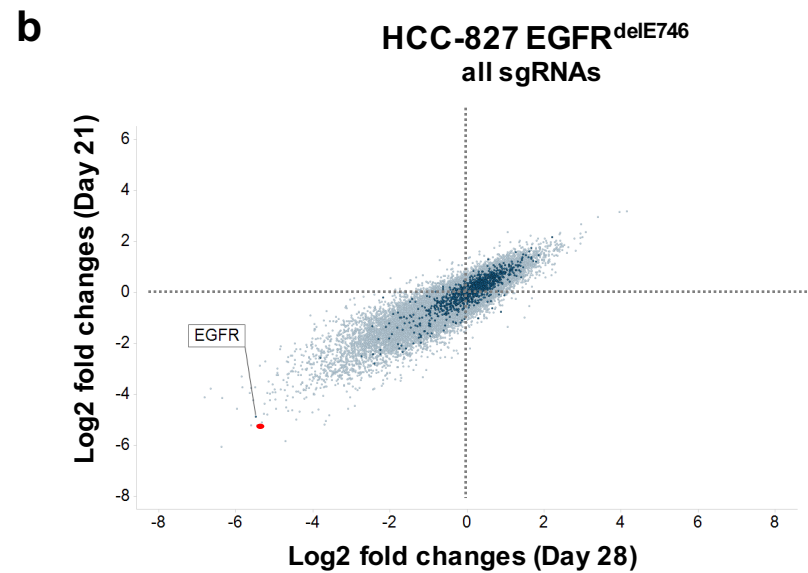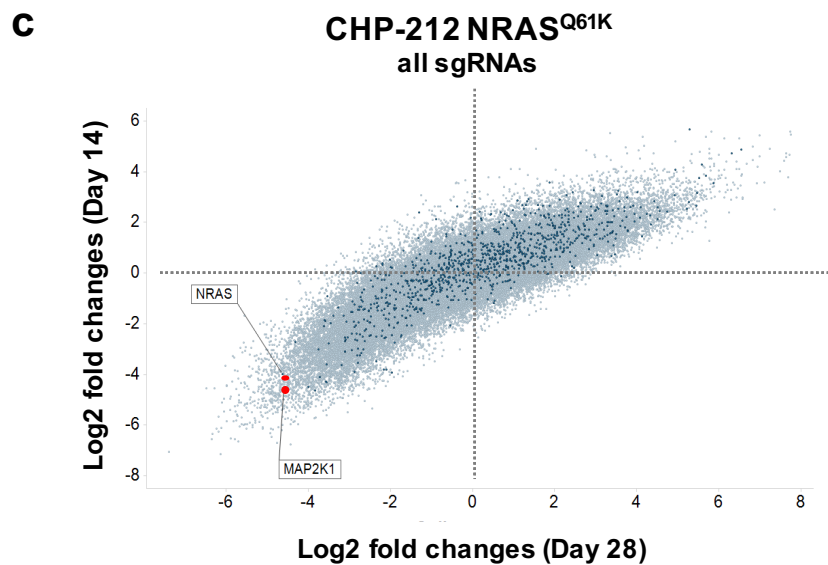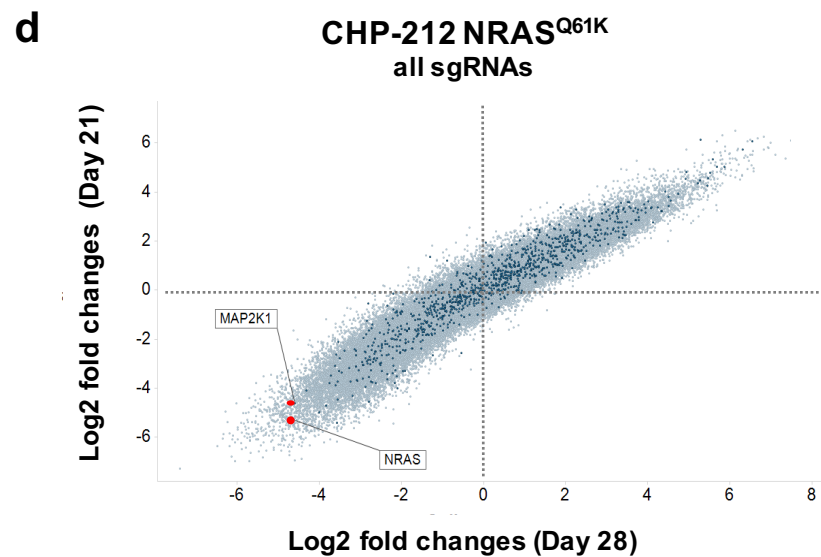

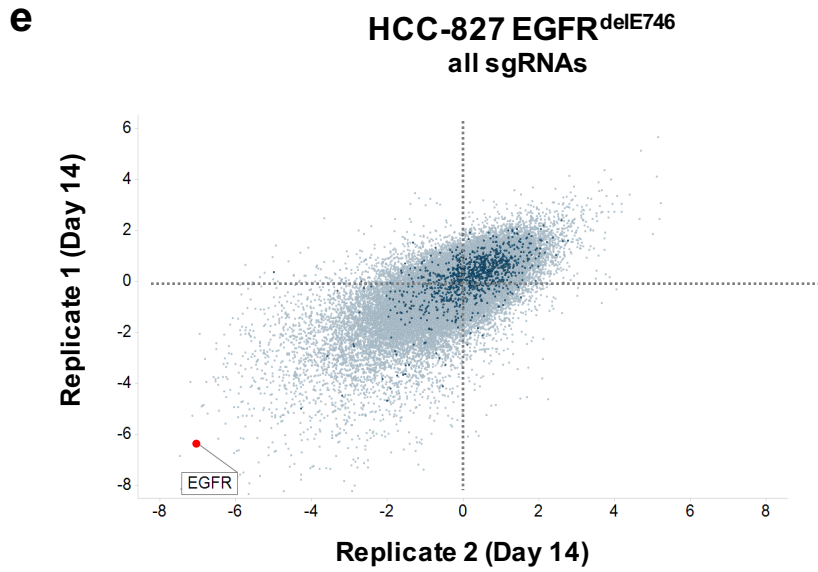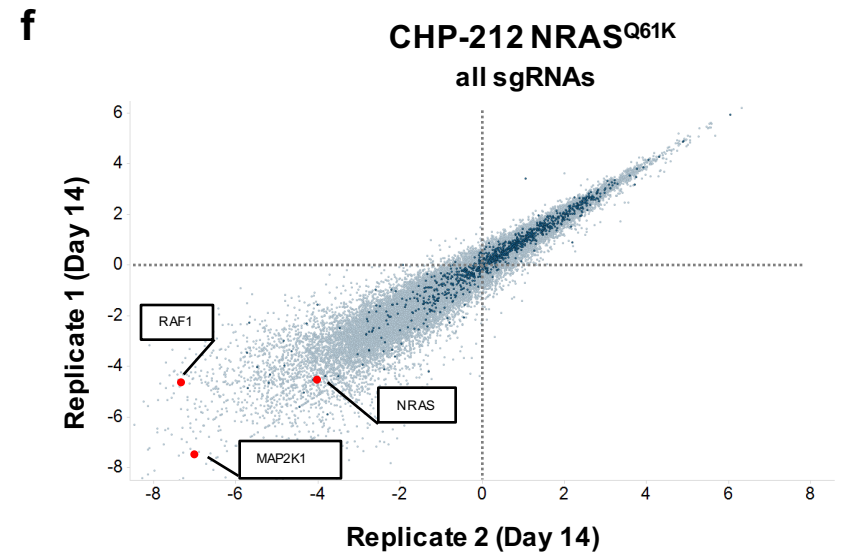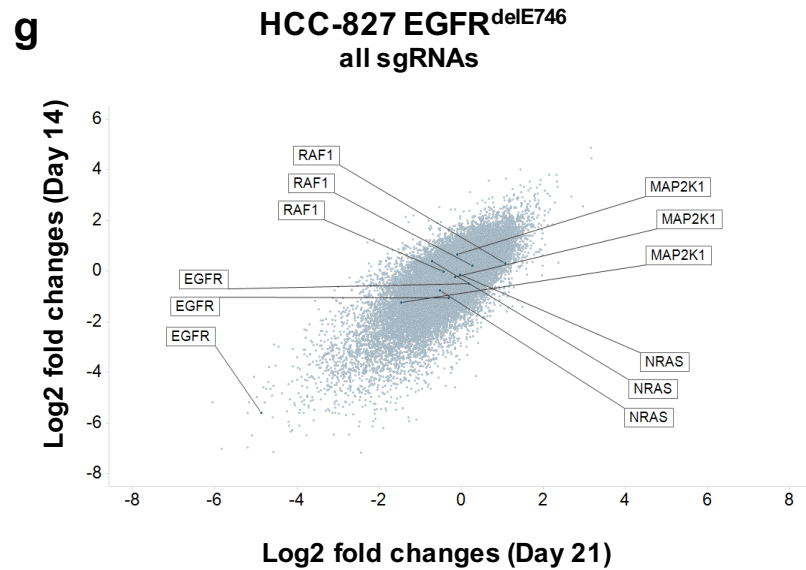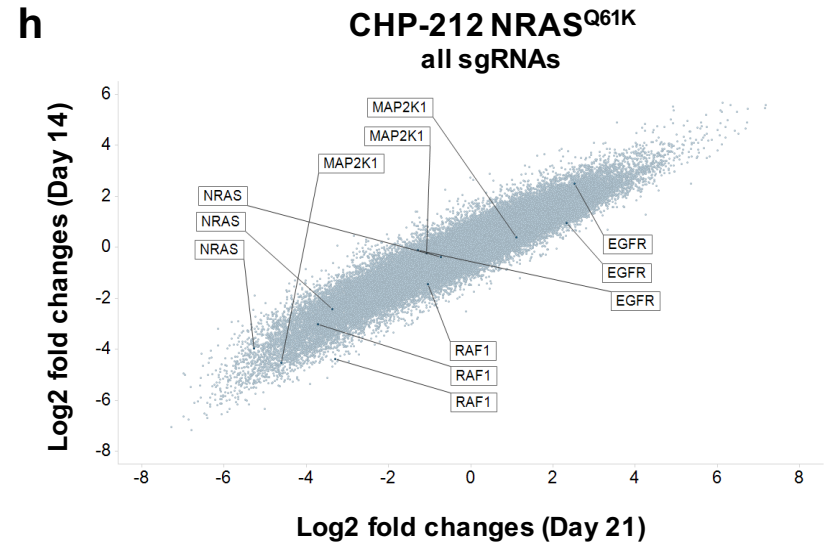



**a****HCC-827 EGFR<sup>delE746</sup>  
all sgRNAs**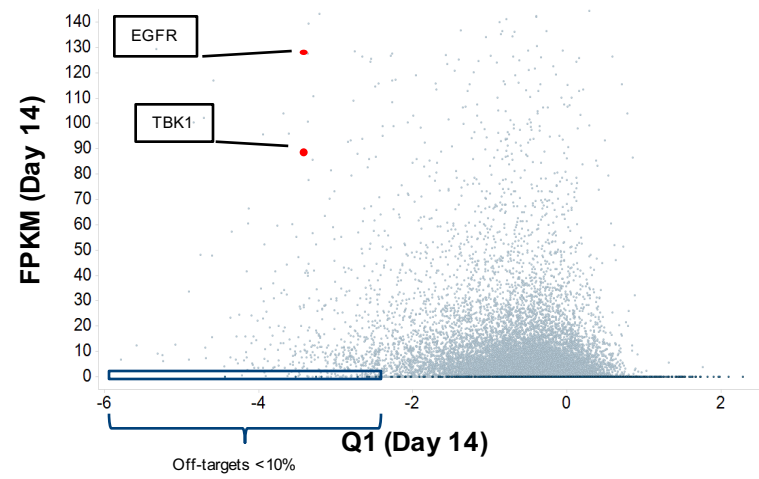**b****CHP-212 NRAS<sup>Q61K</sup>  
all sgRNAs**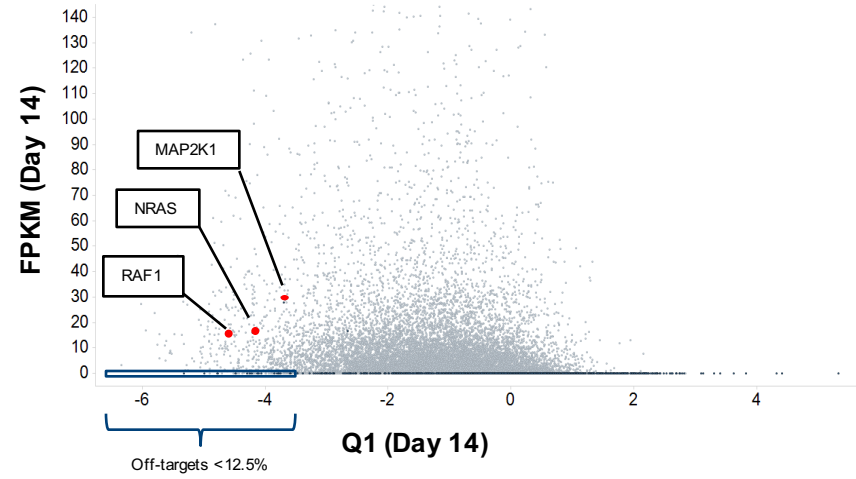

**a**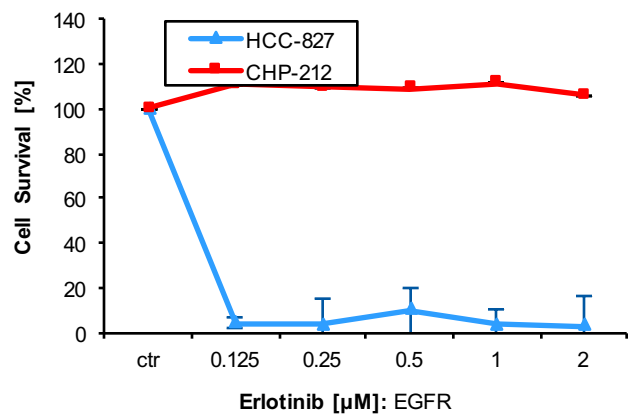**b**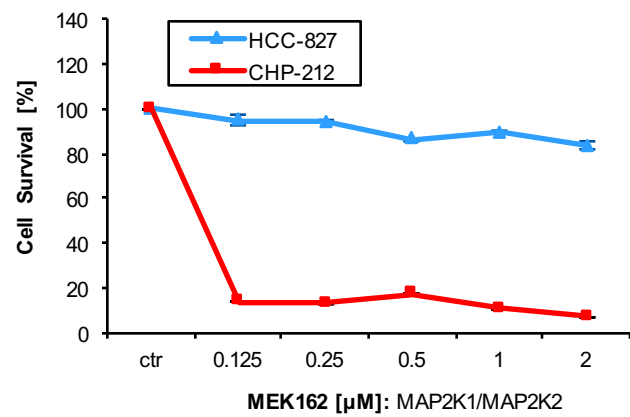

**a****HCC-827 EGFR<sup>del E746</sup>**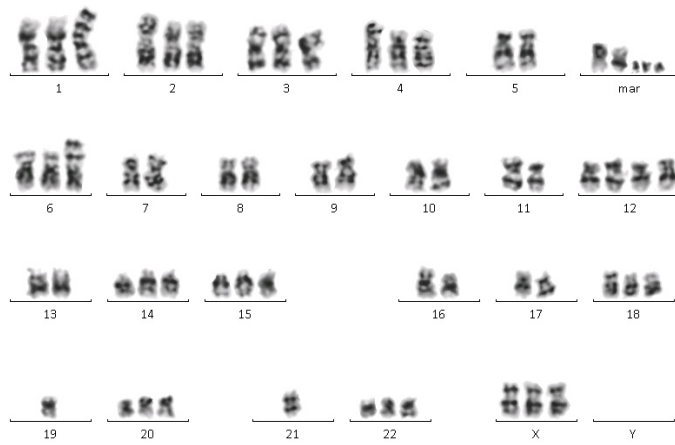**b****CHP-212 NRAS<sup>Q61K</sup>**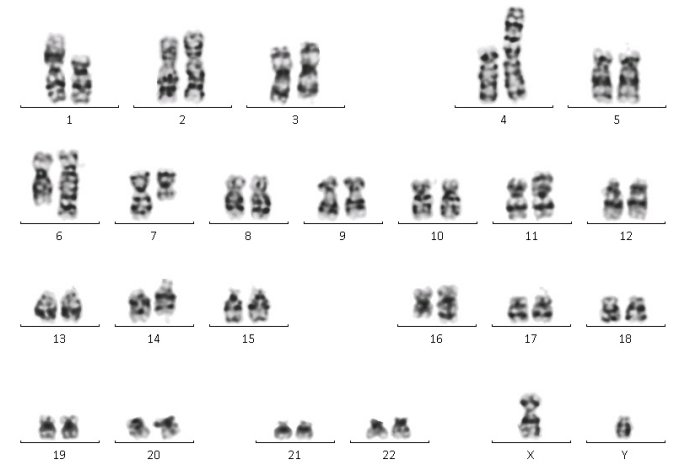

Supplement: 12864_2016_3042_MOESM1_ESM.pdf [file 12864_2016_3042_MOESM1_ESM.pdf]
